1 **High-frequency temperature variability mirrors fixed differences in thermal limits**  
2 **of the massive coral *Porites lobata* (Dana, 1846) (120 Character Limit)**

3 Barshis DJ <sup>1\*</sup>, Birkeland C <sup>2</sup>, Toonen RJ <sup>3</sup>, Gates RD <sup>3</sup> and JH Stillman <sup>4,5</sup>

4 <sup>1</sup> Old Dominion University, Department of Biology, Norfolk VA, USA

5 <sup>2</sup> University of Hawai'i at Manoa, Department of Biology, Honolulu HI, USA

6 <sup>3</sup> Hawai'i Institute of Marine Biology, Kaneohe HI, USA

7 <sup>4</sup> Estuary & Ocean Science Center, Romberg Tiburon Campus and Department of  
8 Biology, San Francisco State University, Tiburon CA, USA

9 <sup>5</sup> Department of Integrative Biology, University of California Berkeley, Berkeley CA,  
10 USA

11  
12 **Keywords:** Coral, Local Adaptation, Climate Change, *Porites lobata*, Thermal Tolerance

13 **Running Title (40 Character Limit):** Adaptation in coral heat tolerance

14  
15 **Corresponding Author:**

16 Daniel J. Barshis

17 Old Dominion University

18 Department of Biological Sciences

19 Mills Godwin Building, 302J

20 Norfolk, VA 23529

21 Phone: 757-683-3614

22 Fax: 757-683-5283

23 Email: dbarshis@odu.edu

24  
25 **Summary Statement (15-30 Words):**

26 Corals native to highly variable habitats demonstrate greater thermal tolerance than corals  
27 from less variable habitats after 36-days of acclimation to thermally stable or variable  
28 common garden treatments.

29

30

31

32

33

34

35

36 **Abstract (250 words)**

37       Spatial heterogeneity in environmental characteristics can drive adaptive  
38 differentiation when contrasting environments exert divergent selection pressures. This  
39 environmental and genetic heterogeneity can substantially influence population and  
40 community resilience to disturbance events. Here, we investigated corals from the highly  
41 variable back reef habitats of Ofu Island in American Samoa that thrive in thermal  
42 conditions known to elicit widespread bleaching and mortality elsewhere. To investigate  
43 the hypothesis that thermal variability is the driving force shaping previously observed  
44 differences in coral tolerance limits in Ofu, specimens of the common Indo-Pacific coral  
45 *Porites lobata* (Dana, 1846) from locations with differing levels of thermal variability  
46 were acclimated to low and high thermal variation in controlled common garden  
47 experimental aquaria. Overall, there was minimal effect of the acclimation exposure.  
48 Corals native to the site with the highest level of daily variability grew fastest, regardless  
49 of acclimation treatment. When exposed to lethal thermal stress, corals native to both  
50 variable sites contained elevated levels of heat shock proteins and maintained  
51 photosynthetic performance for 1-2 days longer than corals from the stable environment.  
52 Despite being separated by < 5 km, there was significant genetic differentiation among  
53 coral colonies ( $F_{ST} = 0.206$ ,  $p < 0.0001$ ; nuclear ribosomal DNA), while *Symbiodinium*  
54 phylotypes were all ITS2-type C15. Our study demonstrates consistent signatures of  
55 adaptation in growth and stress resistance in corals from naturally thermally variable  
56 habitats, emphasizing that existing genetic diversity of corals is an important asset in  
57 strategies to protect and manage coral reef ecosystems in the face of global change.

58

59

## 60 **Introduction**

61 Heterogeneous environments can drive adaptive diversification when contrasting  
62 environmental conditions exert strong divergent selection pressures and individual niches  
63 are not abundant enough to favor the evolution of overall plasticity (e.g., Dempster, 1955;  
64 Kawecki and Ebert, 2004; Levene, 1953; Ravigné et al., 2004). Local adaptation is  
65 expected to evolve in populations with limited connectivity, but if environmentally driven  
66 selection is strong enough, adaptive differentiation can still accumulate despite ongoing  
67 gene flow (Feder et al., 2012; Hoey and Pinsky, 2018). In the marine environment,  
68 reproduction via broadcast spawning and gamete mixing at the sea surface means  
69 dispersal potential (i.e., gene flow) among neighboring habitats can often be high, with  
70 larval neighborhoods sizes of many marine organisms estimated at > 10 km (e.g.,  
71 Palumbi, 2004; Pinsky et al., 2017). Thus, for small-scale population differentiation to be  
72 driven by selection in the sea, certain genotypes must preferentially settle in optimal  
73 habitat-types, or sub-optimal settlers must have reduced fitness via strong post-settlement  
74 selection (Dempster, 1955; Levene, 1953; Ravigné et al., 2004).

75 Despite an established theoretical framework, the functional dynamics of  
76 adaptation and natural selection in most species remain unknown and these processes are  
77 particularly complex in reef building corals due to the symbiotic nature of the organism  
78 (Baird et al., 2007; Pandolfi et al., 2011). For example, adaptation of coral endosymbiotic  
79 algae, *Symbiodinium* spp., is known to confer varying degrees of thermal tolerance  
80 (Howells et al., 2012), and *Symbiodinium* diversity within individual host coral species  
81 can vary across thermal environments (D'angelo et al., 2015; Oliver and Palumbi, 2011).  
82 The specifics of how the genetic diversity of the coral host contributes to adaptation,

83 however, is relatively unknown (Baird et al., 2009; Baird et al., 2007; Barshis et al.,  
84 2010; Dixon et al., 2015; Hoegh-Guldberg et al., 2007; but see Lundgren et al., 2013;  
85 Matz et al., 2018). Adaptation to environmental change, including climate shifts, has  
86 been demonstrated in other organisms (Hancock et al., 2011; Hoffmann and Sgro, 2011;  
87 Sanford and Kelly, 2011), and recent evidence for corals suggests that adaptive  
88 differences in coral thermal tolerance are heritable (Dixon et al., 2015; Kenkel et al.,  
89 2015; Meyer et al., 2009); lending credence to the idea of evolutionary rescue (sensu Bell  
90 and Gonzalez, 2009) of corals from climate impacts.

91         The back reef pools on Ofu Island, American Samoa, represent a natural  
92 laboratory for investigations of adaptation and acclimatization of corals to contrasting  
93 environments due to their high diurnal variation and small-scale heterogeneity in  
94 environmental characteristics (e.g., temperature, pH, flow, dissolved O<sub>2</sub>; Barshis et al.,  
95 2010; Craig et al., 2001; Smith et al., 2007). For example, the highly variable (HV) back  
96 reef pool of Ofu undergoes daily temperature fluctuations of up to 5.6 °C and reaches  
97 daily extremes of > 35 °C (mean daily range 1.59 °C ± 0.42 SD). In contrast, the adjacent  
98 less variable forereef has seasonal maximum daily temperature fluctuations of 1.8 °C  
99 (mean daily range is 0.6 ± 0.2 SD; Craig et al., 2001; Smith et al., 2008; unpublished  
100 data). Corals from among these thermal habitats have phenotypic differences consistent  
101 with local adaptation of thermal performance, including increased prevalence of heat-  
102 tolerant clade D *Symbiodinium* (e.g., *Acropora* spp., *Pocillopora* spp., *Pavona* spp.;  
103 Cunning et al., 2015; Oliver and Palumbi, 2009), constitutive turning-on of genes  
104 involved in cellular stress defense (Barshis et al., 2013), fixed and plastic responses  
105 following field transplantation (Palumbi et al., 2014; Smith et al., 2007; Smith et al.,

106 2008), and small-scale (< 5 km) genetic differentiation of coral hosts (Barshis et al.,  
107 2010; Bay and Palumbi, 2014).

108 In the massive coral *Porites lobata* (Dana, 1846), host genotypes were subdivided  
109 across small spatial scales (< 5 km), while all *Symbiodinium* sequences matched ITS2  
110 phylotype C15 (Barshis et al., 2010). The genetic differentiation of the host mirrored  
111 fixed differences in the cellular stress response (Barshis et al., 2010) and growth  
112 characteristics (Smith et al., 2007) suggestive of genetic adaptation to differences in the  
113 amount of diurnal environmental variability between back-reef pools; however, upper  
114 thermal limits were not tested in previous *P. lobata* studies. Here, we explore whether  
115 high-frequency thermal variability (defined here as diurnal or shorter variation *sensu*  
116 Safaie et al., 2018) is the environmental factor that differentiates growth and thermal  
117 tolerance of *P. lobata* colonies from contrasting habitats on Ofu. We used a common-  
118 garden laboratory acclimation experiment to test the hypothesis that corals from different  
119 thermal habitats have unique responses to daily thermal variation.

120

## 121 **Materials and Methods**

### 122 *Study site, sample collection and transport*

123 Corals were collected during May 2007 from three sites on Ofu and Olosega  
124 islands in the territory of American Samoa (14°11' S, 169°40' W). These islands host  
125 diverse communities of ~85 shallow reef-building coral species, many of which are  
126 consistently exposed to atypically high seawater temperatures (Craig et al., 2001) and  
127 irradiances (Smith and Birkeland, 2007). Two back reef sites, a High Variability (HV)  
128 and Medium Variability (MV) pool, and one low-variability forereef site (forereef) were

129 selected based on general differences in environmental characteristics (Craig et al., 2001;  
130 Piniak and Brown, 2009; Smith et al., 2007; Smith and Birkeland, 2007; Smith et al.,  
131 2008). Briefly, the HV pool is smaller, shallower, more thermally variable, and  
132 experiences higher water flow than the MV pool, while the forereef is relatively more  
133 stable than the HV and MV pools.

134 A pneumatic hole saw drill was used to remove n=30, 19 mm diameter cores from  
135 the upward facing surfaces of each of n=5 source colonies in each site (total n=150  
136 cores). Source colonies were of similar size (1-1.5 m diameter) and at least 5 m apart to  
137 minimize potential for sampling the same clone (i.e., genet). Cores were affixed to nylon  
138 bolts with Z-Spar, Splash Zone marine epoxy (Carboline Company, St Louis, MO) and  
139 placed in the MV pool for a seven-day recovery period prior to shipping. Cores were  
140 wrapped in plastic bags and wet paper towels with a minimal amount of seawater,  
141 shipped in insulated coolers to the environmental simulation aquarium facility at San  
142 Francisco State University's Estuary & Ocean Science Center in Tiburon, CA, and  
143 immediately placed in experimental aquaria. All corals were collected and exported under  
144 applicable permits from the National Park of American Samoa (NPSA-2006-SCI-0001)  
145 and the Department of Marine and Wildlife Resources and imported under the authority  
146 of the US Fish and Wildlife Service.

147

#### 148 *Coral acclimation conditions*

149 The cores from each source colony were divided into two groups of 15 and held  
150 in two separate experimental aquaria at a constant temperature of  $28 \pm 0.5$  °C and average  
151 irradiance of  $260 \mu\text{mol quanta m}^{-2} \text{sec}^{-1}$  (12hr light/dark cycle) for a 28 day recovery

152 period. Algal growth was removed from the nylon bolts daily during the recovery period  
153 using a toothbrush. Following the recovery period, corals were exposed to one of two  
154 different thermal conditions for 35 days: “variable” or “stable”. In the variable aquarium,  
155 temperatures fluctuated between 27 and 32 °C during the afternoon of each day (mean  
156 temperature = 28.2 °C) while the other aquarium was set to remain stable at 28.5 °C (Fig  
157 1). The specific temperatures and amplitude of the treatments were chosen to reflect  
158 average water temperature and daily range extremes of natural summer temperature  
159 profiles of the forereef and back reef sites (Barshis et al., 2010; Craig et al., 2001; Smith  
160 et al., 2008). Due to equipment malfunction, there were two days of the acclimation when  
161 the stable aquarium and variable aquarium reached the same high temperature and three  
162 days where the stable aquarium reached temperatures below that of the variable aquarium  
163 (Fig S1). After the 35-day acclimation period, coral growth, photophysiology, and protein  
164 stress biomarkers were assessed.

165 We acknowledge that it would have been preferable to directly replicate the  
166 acclimation tanks and treatments, however it was both logistically and financially  
167 prohibitive to do so. Each system cost many thousands of dollars to achieve such  
168 manipulable temperature control and the acclimation period (28 + 36 days) was of such  
169 an extended duration that successive field collections and trials were unable to be  
170 performed. Additionally, both aquaria had a constant flow of water from the same 5,000  
171 L recirculating water source, likely preventing any substantial differences in water  
172 chemistry between tanks. Each tank was continuously fed from this water source  
173 throughout the experiment at a flow rate of ~4 tank volumes per day. This same system  
174 has been used successfully in other published studies (e.g., Paganini et al., 2014).

175 Furthermore, we believe the concordance between this study's lab-based results and those  
176 of prior field experiments demonstrating strong fixed effects of origin in this species and  
177 minimal effects of acclimation treatment corroborate the assertion of little to no  
178 confounding influence of the single tank replicates on the results of the study.

179

#### 180 *Growth*

181 New tissue growth was measured as the distance the growth margin had extended  
182 down the sides of each coral core since original sampling; measured linearly down the  
183 four cardinal sides of each core using calipers. The four measurements were averaged and  
184 analyzed using a single average value for each individual core.

185

#### 186 *Photophysiology*

187 Chlorophyll *a* fluorescence of *Symbiodinium* sp. was measured using a pulse-  
188 amplitude modulated (PAM) fluorometer (DIVING-PAM, Walz GmbH, Germany). PAM  
189 fluorometry is a rapid, non-invasive technique which assesses the photosynthetic  
190 efficiency of photosystem II (PSII) reaction centers which can be used as a proxy for  
191 assessing the health of the symbiotic association (Fitt et al., 2001). DIVING-PAM  
192 parameters and measurements were made following a previous study (Piniak and Brown,  
193 2009); initial fluorescence measurements (*F*) were between ~150–400 units and  
194 maximum fluorescence (*F'm*) was measured using a saturating light pulse (0.8 s, ~8000  
195  $\mu\text{mol quanta m}^{-2} \text{s}^{-1}$ ). Maximum quantum yield [ $(Fm - Fo)/Fm$ , or  $Fv / Fm$ ] was measured  
196 for dark-adapted samples at the end of each experimental day 45 min after all lights had  
197 been turned off.



198

199 *Thermal challenge*

200           After the 35-day acclimation period, a “temperature ramp” was performed. This  
201 consisted of placing five replicate cores from all source colonies and treatments in the  
202 variable temperature aquarium (baseline 27, peak 32 °C) for one day and subsequently  
203 raising the baseline and peak temperatures by 2 °C every 24 hrs for four additional days  
204 with a final temperature fluctuation of 35 - 40 °C and total experimental duration of 120  
205 hrs (Figs. S1, 3). PAM measurements were taken each day at 21:15 after 45 min of dark-  
206 adaptation. A single core from each source colony and acclimation treatment was  
207 sacrificed for protein analyses following PAM measurements each night, flash frozen in  
208 liquid nitrogen, and stored at -80 °C until analyzed as described below.

209

210 *Protein biomarkers: Hsp70 and ubiquitin-conjugates*

211           Each coral core was flash frozen in liquid nitrogen and the tissue layer (up to 1 cm  
212 below surface) was removed with bone cutting pliers and placed in a pre-frozen, 50 ml  
213 stainless steel mixing jar (Glennmills, Clifton, NJ). The tissue and skeleton of each tissue  
214 layer was crushed using a TissueLyser<sup>®</sup> (Qiagen, Valencia, CA) at 25 rpm for 5 s, and the  
215 powdered samples were transferred to individual 2.5 ml cryovials and stored at -80 °C  
216 until further analyses.

217           Between 280-380 mg of crushed tissue was added to a prechilled 2 ml  
218 microcentrifuge tube before adding 750 µL of chilled 50 mM phosphate buffer (K<sub>2</sub>HPO<sub>4</sub>  
219 + KH<sub>2</sub>PO<sub>4</sub>; pH 7.8). Samples were vortexed and centrifuged at 2,000 x g for 5 min to  
220 separate out host and algal endosymbiont (*Symbiodinium*) tissue fractions. The

221 supernatant (host fraction) was removed and placed on ice while the remaining pellet  
222 (skeletal debris and *Symbiodinium* fraction) was washed three times with fresh phosphate  
223 buffer before re-suspension in a final volume of 500  $\mu$ L of phosphate buffer, sonicated  
224 for 5 min, and briefly centrifuged to remove skeletal debris. Aliquots were removed from  
225 both host and *Symbiodinium* fractions and stored at -80 °C until further analyses.

226 Levels of heat shock protein 70 (hsp70) and ubiquitin-conjugated proteins were  
227 assessed via western blot for both host and *Symbiodinium* protein fractions as described  
228 previously (Barshis et al., 2010). All samples were assayed in triplicate and a single  
229 average concentration per sample was analyzed.

230

### 231 *Host genetic analyses*

232 To assess the potential influence of host genotype on physiological responses, the  
233 internal transcribed spacer region (ITS) of nuclear ribosomal DNA was amplified and  
234 sequenced from each individual source colony. Primer sequences, polymerase chain  
235 reaction conditions, and sequencing methods were performed as described previously  
236 (Barshis et al., 2010). Resulting sequences were inspected using Sequencher version 4.5  
237 (Gene Codes Corp., Ann Arbor, MI) and aligned using Bio-edit (Hall, 2001) and by eye.  
238 Population genetic structure was estimated using an analysis of molecular variance  
239 (AMOVA) in Arlequin 2.0 (Schneider, 2000). A molecular phylogenetic network was  
240 constructed using the median-joining algorithm and maximum parsimony post-processing  
241 calculation in NETWORK ver 4.5.0.0 (Fluxus Technology Ltd., Polzin and  
242 Daneschmand, 2003).

243

244 *Statistical analyses*

245           Within a common garden framework, comparisons between transplant groups are  
246 designed to assess acclimation potential versus genetic/epigenetic control over the  
247 response variables. Comparisons between acclimation treatments examine environmental  
248 effects (i.e., phenotypic plasticity), while comparisons between source colony origins and  
249 individuals examine potential genetic or epigenetic influence on the response variables  
250 (DeWitt and Scheiner, 2004; Schluter, 2000; Smith et al., 2007).

251           Growth, photosynthetic efficiency, and western blot biomarker levels were  
252 assessed from field collections prior to shipping (field baseline), following the  
253 acclimation to the differing temperature profiles of the two experimental aquaria  
254 (acclimation baseline), and during the temperature ramp. For the field baseline and  
255 acclimation baseline tests, all variables were tested against the fixed factors of source  
256 colony origin and acclimation treatment in a two-way ANOVA (aov) with source colony  
257 individual (i.e., genotype) included as a random factor. Post-hoc analyses of significant  
258 main effects were computed using the lsmeans function in R v3.2.2 (R\_Core\_Team,  
259 2015). Individual clonal replicates within time points were averaged prior to the ANOVA  
260 and plotting to avoid pseudoreplication. Assumptions of normality and homoscedasticity  
261 were tested via the shapiro.test and fligner.test functions in R v3.2.2 (R\_Core\_Team,  
262 2015), respectively. For comparisons across time points, a repeated measures framework  
263 was used incorporating source colony identity (i.e., individual genotype) as a unit of  
264 repeated measure, allowing for a between-subjects test of origin and within-subjects tests  
265 of acclimation and day. Post-hoc analyses of multiple comparisons were computed using  
266 the lsmeans function in R v3.2.2 (R\_Core\_Team, 2015).

267

## 268 **Results**

### 269 *Initial acclimation: temperature*

270           The stable treatment had a slightly higher mean temperature and lower standard  
271 deviation than the variable treatment ( $28.54 \pm 0.63$  and  $28.15 \pm 1.20$  °C for the stable and  
272 variable tanks respectively; Figs. 1, S1). On average, the daily range of the variable tank  
273 was 11.84 times greater than the daily range of the stable tank. Of the 33 acclimation  
274 days for which temperature records were available, the variable tank had a daily range  
275 greater than 3 °C on 24 days (73 %), while the daily range of the stable tank exceeded 3  
276 °C on only one day due to a heater malfunction (Fig. S1). Irradiance levels did not appear  
277 to differ between the two tanks with an average irradiance of 263 and 259  $\mu\text{mol quanta}$   
278  $\text{m}^{-2} \text{sec}^{-1}$  for the stable and variable tank respectively.

279

### 280 *Initial acclimation: growth*

281           New tissue extension during the acclimation period was affected by source colony  
282 origin ( $p = 0.0106$ ; Fig. 2, Table S1). HV source colonies grew fastest overall, with an  
283 average tissue extension of  $10.85 \text{ mm} \pm 2.72 \text{ SD}$  and  $11.66 \text{ mm} \pm 2.23 \text{ SD}$  in the stable  
284 and variable tanks respectively compared to MV source colonies ( $8.07 \text{ mm} \pm 2.62 \text{ SD}$   
285 and  $7.60 \text{ mm} \pm 2.01 \text{ SD}$ ) and forereef source colonies ( $6.06 \text{ mm} \pm 2.00 \text{ SD}$  and  $8.01 \text{ mm}$   
286  $\pm 1.80 \text{ SD}$ ) for the stable and variable treatments respectively. There was no significant  
287 difference in growth between acclimation treatments for corals from any origin ( $p =$   
288  $0.0977$ ; Fig. 2, Table S1).

289

290 *Temperature ramp: photophysiology*

291 Measurements of maximum quantum yield ( $F_v/F_m$ ) were significantly affected by  
292 source colony origin, day, and an origin x day interaction ( $p = 0.0036$ ,  $<0.0001$ ,  $<0.0001$   
293 respectively; Fig. 3, Table S2). On days three and four of the temperature ramp, corals  
294 from the thermally stable forereef had markedly lower effective quantum yield ( $F_v/F_m$ )  
295 compared to back-reef corals regardless of acclimation treatment (Fig. 3, Table S2).  
296 There was no effect of acclimation treatment throughout the temperature ramp. By the  
297 end of the ramp (day 5), corals from all populations had little to no fluorescence signature  
298 (Figs. 3, Table S2).

299

300 *Hsp70 and ubiquitin-conjugates: Symbiodinium fraction*

301 Hsp70 levels in the *Symbiodinium* fraction of field-collected samples were  
302 different among origins ( $p = 0.0259$ , Table S3A), with forereef levels 3.5 times lower  
303 than MV corals ( $p = 0.0249$ ; Fig. 4, Table S3A). Ubiquitin-conjugate levels were also  
304 different among origins ( $p = 0.0352$ ; Fig. 5, Table S4A), with forereef levels 10.3 times  
305 lower than HV corals ( $p = 0.0439$ ; Fig. 5, Table S4A). Following acclimation, both  
306 origin, acclimation, and origin \* acclimation effects were observed ( $p = 0.0398$ ,  $p <$   
307  $0.0001$ , and  $p = 0.0093$  respectively; Table S3B) in *Symbiodinium* hsp70 levels, with 3.3  
308 times lower levels in the stable vs variable acclimation treatment ( $p < 0.0001$ ; Table S3B)  
309 and 10.2 times higher in the HV vs. MV or forereef variable acclimated corals ( $p =$   
310  $0.0029$ ,  $p = 0.0032$  for MV and forereef contrasts respectively; Table S3B).

311 *Symbiodinium* ubiquitin-conjugates were not different amongst origins or acclimation  
312 treatments following acclimation (Fig. 5, Table S4B). During the temperature ramp, a

313 mix of origin and acclimation effects were observed, with variable and contrasting  
314 responses across groups throughout the experiment (Figs. 4, 5, Tables S3C, S4C).

315

#### 316 *Hsp70 and ubiquitin-conjugates: Host fraction*

317 Neither host hsp70 nor ubiquitin-conjugate protein levels were different in the  
318 field-collected samples (Figs. 6, 7, Tables S5A, S6A). Following acclimation, host hsp70  
319 levels were similar amongst origins but 1.4 times higher on average in stable-acclimated  
320 corals ( $p = 0.0029$ ; Fig 5, Table S5B), while ubiquitin-conjugates were 2.2 times lower  
321 on average in stable-acclimated corals ( $p = 0.0012$ ; Fig 7, Table S6B). Host hsp70 levels  
322 were 2.9 and 2.5 times higher in HV vs. forereef corals on days 2 and 4 of the heat ramp  
323 respectively ( $p = 0.0129$ ,  $p = 0.0404$ ; Fig 6, Table S5C), and there was a significant  
324 origin x day interaction in host ubiquitin-conjugate levels ( $p = 0.0080$ ), though no  
325 significant individual contrasts (Fig 7, Table S6C).

326

#### 327 *Host genetic analyses*

328 A 368 base pair (bp) fragment of the internal transcribed spacer region (ITS) was  
329 amplified from 15 individuals ( $n=5$  per origin) and subsequently cloned for a total of 77  
330 cloned sequences (NCBI accession numbers xxxxxx – xxxxxx). These 77 sequences were  
331 comprised of 28 unique haplotypes: one shared between the HV and MV pools, one  
332 shared between the HV pool and forereef, and eight, nine, and nine unique to the HV,  
333 MV, and forereef sites respectively (Fig. 8). An analysis of molecular variance  
334 (AMOVA) revealed significant population subdivision among all three populations ( $F_{ST}$   
335  $= 0.2061$ ,  $p < 0.0001$ ). Pairwise  $F_{ST}$  comparisons were highest between the MV pool and

336 the other two populations ( $F_{ST} = 0.2483$  and  $0.2319$ ,  $p < 0.0001$  for HV and forereef  
337 respectively), while the HV pool and forereef showed lower but still significant  
338 subdivision ( $F_{ST} = 0.0509$ ,  $p < 0.03$ ). This was qualitatively evident in the phylogenetic  
339 network construction, which showed a more explicit separation between MV haplotypes  
340 versus HV and forereef haplotypes (Fig. 8).

341

## 342 **Discussion**

### 343 *The influence of high-frequency variability on coral physiological tolerance limits*

344 Here, we found that increasing the amount of high-frequency thermal variability  
345 (i.e., diurnal or shorter time-scales) for 36 days of acclimation had little to no effect on  
346 coral growth, photophysiology, thermal tolerance, or protein biomarker response (Figs. 2-  
347 7). The predominant signal in our data was that of source population origin, in that corals  
348 from back reef habitats (HV and MV) with consistent high-frequency variability in  
349 thermal and other environmental characteristics grew faster and had elevated thermal  
350 tolerance limits compared to corals from the more thermally stable forereef, regardless of  
351 acclimation treatment. Taken together, these results suggest real differences in thermal  
352 tolerance limits between back reef corals that have routinely been exposed to high-  
353 frequency environmental variability and forereef corals native to a less-variable  
354 environment. The disparity between the lack of acclimation effects and strong origin  
355 effects speaks to the potential for chronic exposure to high-frequency variability to exert  
356 differential selection pressure over very small spatial scales ( $< 5$  km).

357 The most widely-used models of coral bleaching impacts and thermal tolerance  
358 differences rely on island-scale or regional level data (e.g., the 5 km pixel width of

359 NOAA Coral Reef Watch; Heron et al., 2016). However, our findings demonstrate  
360 substantial differences in coral thermal tolerances across hundreds of meters to a few  
361 kilometers. This follows previous results from Ofu corals in the highest variability back  
362 reef habitats showing meter-scale differences in increased prevalence of heat-tolerant  
363 clade D *Symbiodinium* (e.g., *Acropora* spp., *Pocillopora* spp., *Pavona* sp.; Cunning et al.,  
364 2015; Oliver and Palumbi, 2009), constitutive turning-on of genes involved in cellular  
365 stress defense (Barshis et al., 2013), acclimation gains in thermal tolerance following 12+  
366 months of exposure to the HV pool (Palumbi et al., 2014), and small-scale (< 5 km)  
367 genetic differentiation of coral hosts consistent with local adaptation (Barshis et al., 2010;  
368 Bay and Palumbi, 2014).

369         A number of other studies across the globe have found similar small-scale  
370 differences in physiological tolerance limits between corals from habitats with  
371 contrasting amounts of short-term environmental variability. For example, *Porites*  
372 *astreoides* corals from inshore environments with high-frequency thermal variability in  
373 the Florida Keys bleached less during thermal stress (Kenkel et al., 2013), demonstrated  
374 increased flexibility in gene expression modulation (Kenkel and Matz, 2016), and  
375 increased growth rates that were heritable between generations (Kenkel et al., 2015)  
376 compared to corals from lower variability offshore sites (~ 7 km away). Similarly, Pineda  
377 et al. (2013) found decreased mortality in *Stylophora pistillata* on protected (shoreward)  
378 vs. exposed (seaward) sides of reefs in the central Red Sea following a natural bleaching  
379 event in 2010. Despite being separated by < 300 m, the protected sides of the reefs had  
380 greater high-frequency thermal variability than exposed sites presumably due to  
381 decreased wind-driven mixing (Pineda et al., 2013). Similar increased stress tolerance



382 was observed in inshore vs. offshore populations of *Montastrea annularis* in Belize  
383 (Castillo and Helmuth, 2005), which was subsequently linked to long-term declines in  
384 growth rates in offshore populations of this species over the past few decades (Castillo et  
385 al., 2012). A recent large-scale meta-analysis of in-situ temperature records and bleaching  
386 surveys from 5 reef regions around the globe found that greater amounts of high-  
387 frequency temperature variability were correlated with reduced bleaching severity and  
388 bleaching prevalence (Safaie et al., 2018), suggesting the trends observed in the various  
389 single-site, single-species studies may be valid at the global and whole-reef community  
390 scales.

391       There are a few notable exceptions to this pattern, however, with high variability  
392 and low variability populations of *Acropora palmata* and *Porites astreoides* in the  
393 Cayman Islands exhibiting a nearly identical response to increased heat and pCO<sub>2</sub>  
394 exposure (Camp et al., 2016), and exposure to greater high-frequency thermal variability  
395 eliciting bleaching rather than resilience in *Pocillopora meandrina* and *Porites rus* in  
396 Moorea, French Polynesia (Putnam and Edmunds, 2011). While the specific threshold  
397 above which high-frequency variability increases resilience and/or the tipping points  
398 between beneficial exposures versus chronic stress remain to be determined, our data  
399 corroborate a growing body of evidence from multiple ocean basins, coral species,  
400 genera, and habitat types suggesting a mostly beneficial role of high-frequency variability  
401 in increasing coral resilience to thermal stress. Thus, it is conceivable that that differing  
402 degrees of environmental variability may exert divergent selection pressures across these  
403 small-scales and drive adaptive differentiation.

404

405 *Is temperature variability really the most important driver?*

406           Despite the overall effects of source colony origin, however, we found little  
407 evidence that acclimation to high-frequency temperature variability altered thermal  
408 tolerance limits in this species. In contrast to the lack of acclimation observed herein,  
409 multiple studies of *Acropora* spp. have demonstrated increased thermal tolerance  
410 following short-term (days to weeks) exposure to elevated temperatures. *Acropora nana*  
411 from a single back-reef population on Ofu exposed to variable temperatures (29-33 °C)  
412 bleached less and had a muted gene expression response compared to corals acclimated  
413 to 29 °C after just 7-11 days of exposure to the variable thermal regime (Bay and  
414 Palumbi, 2015). Similarly, *Acropora millepora* preconditioned to a 10-day mild stress (3  
415 °C below the experimentally determined bleaching threshold) bleached less during  
416 subsequent heat stress than non-preconditioned corals (Bellantuono et al., 2012b) and  
417 exhibited a muted gene expression response as well (Bellantuono et al., 2012a), similar to  
418 that seen in variable acclimated *Acropora nana* (Bay and Palumbi, 2015) and HV A.  
419 *hyacinthus* (Barshis et al., 2013) in Ofu. Lastly, *Acropora aspera* preconditioned to a 48  
420 hr pre-stress (31 °C) bleached less and maintained elevated photosynthetic efficiency  
421 during a subsequent 6-day heat stress (34 °C) compared to non-preconditioned corals  
422 (Middlebrook et al., 2008).

423           Most prior thermal-acclimation work in corals has focused on branching species  
424 in the genus *Acropora*, due to their ubiquity on the reef and known variation in thermal  
425 sensitivity (e.g., Loya et al., 2001; van Woesik et al., 2011). In contrast, massive coral  
426 species such as *Porites lobata*, are thought to be more thermally tolerant due to greater  
427 tissue thicknesses (Loya et al., 2001), increased mass transfer rates (Loya et al., 2001;

428 Nakamura and Van Woesik, 2001), and elevated metabolism (Gates and Edmunds, 1999)  
429 compared to most branching coral species (primarily *Acropora* and *Pocillopora*). Thus,  
430 as a species with a massive morphology, *Porites lobata* may have a greater innate  
431 temperature tolerance range to begin with, simply tolerating the environment when faced  
432 with new conditions versus the physiological acclimation seen in Acroporids. However,  
433 the consistent origin effects on growth, thermal tolerance, and cellular response suggests  
434 that the differing amounts of high-frequency variability in environmental characteristics  
435 between the back reef and forereef habitats do influence thermal tolerance limits in *P.*  
436 *lobata*, though perhaps over longer timescales than those under investigation.

437       Significant origin effects in common garden experiments are generally attributed  
438 to potential genotypic (i.e., adaptive) influence on the response variable (DeWitt and  
439 Scheiner, 2004; Sanford and Kelly, 2011; Schluter, 2000). However, long-term  
440 acclimatization, developmental plasticity, and/or epigenetics can similarly cause apparent  
441 origin effects. Corals are long-lived organisms, and based on the size (>1 m diameter) of  
442 the colonies used in this study, we roughly estimate the minimum age of the source  
443 colonies to be > 60 years old (based on > 500 mm radius and ~8 mm/year growth rate  
444 sensu Houck et al., 1977; Potts et al., 1985). Decadal-scale ‘environmental memory’ was  
445 recently observed in the massive coral *Coelastrea aspera*, with former west sides of  
446 colonies (experimentally turned to face east) that had been previously exposed to high-  
447 irradiance levels retaining four times the *Symbiodinium* during a natural bleaching event  
448 compared to un-manipulated east-facing/low-irradiance sides of colonies; despite 10  
449 years of conditioning to the low-irradiance eastern orientation and identical  
450 *Symbiodinium* phylotypes (Brown et al., 2015). This certainly raises the possibility that

451 long-term conditioning to the high-frequency environmental variability of the Ofu back-  
452 reef could have long-lasting acclimation effects on *P. lobata* thermal tolerance limits that  
453 may not have been altered by our 36-day exposure.

454         However, we did observe acclimation effects on host and *Symbiodinium* protein  
455 biomarkers, particularly hsp70 (Figs. 4-7; Tables S3-S6). While differences across  
456 acclimation treatments were variable in magnitude and direction depending on the marker  
457 and day, the host hsp70 response demonstrated an interesting pattern relative to the  
458 fluorescence response. On the final day of the acclimation treatment, host hsp70 levels  
459 were lower in the variable vs. stable acclimated corals (Fig. 6, Table S5B), suggesting  
460 reduced need for chaperone activity following variable thermal exposure. However, the  
461 initial acclimation effect was supplanted by a strong origin effect with the greatest host  
462 hsp70 increase in HV corals on days 2 and 4 of the temperature ramp (Fig. 5, Table S5C),  
463 corresponding to the greater maintenance of photosynthetic efficiency in HV corals on  
464 days 3 and 4 (Fig. 3, Table S2). It is notable that a similarly rapid and higher induction of  
465 hsp70 was observed in back reef vs. forereef corals in our previous field study following  
466 transplantation (Fig. 4A from Barshis et al., 2010). Thus, it is tempting to speculate that  
467 the larger and more rapid hsp70 increases in HV corals during the temperature ramp  
468 might signify a higher capacity for maintenance of homeostasis under thermal stress.  
469 While not conclusive evidence for or against a mechanism of long-term acclimatization  
470 vs. local adaptation, the acclimation and origin effects in protein response observed  
471 herein and previously (Barshis et al., 2010) demonstrate the ability of these corals to  
472 respond to high-frequency thermal variability over short time-scales as well as potential  
473 evolutionary constraints on that ability related to population of origin.

474           Alternatively, the increased thermal tolerance limits of back-reef corals may have  
475 been influenced very early on either via developmental canalization post-settlement in the  
476 back-reef, parental effects, and/or epigenetic acclimatization. Both maternal effects and  
477 signatures of differential epigenetic modification have been recently observed in  
478 *Pocillopora damicornis*, with larvae from parents exposed to high temperature and  $p\text{CO}_2$   
479 exhibiting metabolic acclimation during subsequent stress compared to larvae from un-  
480 exposed parents (Putnam and Gates, 2015) and increased levels of DNA methylation in  
481 adults following high  $p\text{CO}_2$  exposure (Putnam et al., 2016), suggesting that the observed  
482 larval acclimation could have been caused by epigenetic modification. In Ofu, however,  
483 larvae from back reef parents would have to settle/disperse back to the pool of origin for  
484 epigenetic modification from parents to positively affect the response of the offspring. If  
485 there was epigenetic modification of larvae from back reef parents but the larvae all  
486 dispersed outside the HV and MV pools, then there would be no positive contribution to  
487 the phenotype of the next generation.

488           While long-term acclimatization, parental effects, and/or epigenetic modification  
489 could explain the thermal tolerance differences between our populations, none of these  
490 processes would likely cause the genetic differentiation among populations seen here.  
491 The significant genetic subdivision among all three populations suggests the presence of  
492 a physical or environmental barrier to gene flow between the HV, MV, and forereef  
493 populations, strong divergent selection pressures, or potential cryptic species/genepools  
494 across the habitats in Ofu. Reduced connectivity across such a small spatial scale (~500  
495 m -1 km between HV and MV, and ~5 km between HV/MV and the forereef) is unlikely  
496 to be due to a physical barrier alone, as the water masses in the back reef appear to be

497 well-mixed during the daily high tide cycle and well-within the spatial range of  
498 dispersing larvae. Bay and Palumbi (2014) observed a similar pattern of genetic  
499 differentiation between HV and MV *Acropora hyacinthus*, though only at a subset of  
500 outlier single nucleotide polymorphisms (SNPs) putatively responding to selection. They  
501 posited a mechanism involving strong spatial balancing selection, wherein the contrasting  
502 environmental pressures of each habitat exert high selection pressure on settling coral  
503 larvae from a common gene pool (sensu a protected polymorphism via an environment x  
504 genotype association; Bay and Palumbi, 2014; Levene, 1953; Ravigné et al., 2004;  
505 Sanford and Kelly, 2011). van Oppen et al. (2018) found a similar pattern of  
506 differentiation and outlier loci separating reef flat and reef slope *Pocillopora damicornis*  
507 on Heron Island in Australia and posited a similar mechanism of environmentally driven  
508 selection. The ITS locus sequenced herein is unlikely to be a direct target of selection,  
509 though differentiation at this locus could be correlated with the specific gene targets  
510 responding to selection.

### 511 *Conclusions*

512       The limited acclimation response, enhanced thermal tolerance capacity of back  
513 reef corals, differential biomarker response, and significant genetic differentiation  
514 observed in the present study are all consistent with a model of post-settlement selection  
515 and adaptation of coral genotypes to the greater amount of high-frequency  
516 environmental variability in the MV and HV pools. However, the lack of acclimation in  
517 thermal tolerance limits following 35 days of exposure to *temperature* variability alone,  
518 calls into question whether differences in high-frequency temperature exposures among  
519 habitats are the driving force behind these differences. Differences in the amount of high-

520 frequency temperature variability remains the common factor across the multiple  
521 experiments on Ofu (Barshis et al., 2013; Barshis et al., 2010; Bay and Palumbi, 2014;  
522 Craig et al., 2001; Cunning et al., 2015; Oliver and Palumbi, 2011; Palumbi et al., 2014;  
523 Smith et al., 2007), the Red Sea (Pineda et al., 2013), Florida Keys (Kenkel et al., 2013;  
524 Kenkel et al., 2015; Kenkel and Matz, 2016), meso-american barrier reef (Castillo and  
525 Helmuth, 2005; Castillo et al., 2012), Australia (van Oppen et al., 2018), and the variety  
526 of sites examined in Safaie et al. (2018). Future research should focus on assessing the  
527 potential influences of other environmental drivers on the observed differences in thermal  
528 limits, as well as the relative contributions of long-term acclimatization and/or  
529 developmental canalization. Additionally, the magnitude of  $F_{ST}$  differentiation observed  
530 herein makes it difficult to contextualize the scale of genetic differentiation across  
531 populations. Future in-depth genetic analysis of massive *Porites* populations from a  
532 variety of habitat types may provide a clearer picture of the potential for cryptic genotype  
533 x environment associations in this taxonomic group.

534

### 535 **Acknowledgements**

536 Thanks to the many field and laboratory assistants that made this research possible; to M.  
537 Mizobe, L. Smith, T. Waterson, C. Tomas-Miranda, the Stillman Lab at SFSU, P. Craig  
538 and the staff at the National Park of American Samoa especially the late Fale Tuilagi, and  
539 Vaoto Lodge for field and lab support; Z. Forsman for primer sequences, advice, and  
540 assistance; and to anonymous reviewers for valuable comments. This is contribution  
541 number ##### of the Hawai'i Institute of Marine Biology. The use of trade, firm, or  
542 corporation names in this publication does not constitute an official endorsement or  
543 approval of any product or service to the exclusion of others that may be suitable.

544

### 545 **Competing interests**

546 The authors declare no competing or financial interests.

547

### 548 **Data Accessibility:**

549 All raw data, analyses, and scripts are available as an electronic notebook:

550 (<https://github.com/BarshisLab/Poriteslobata-thermal-adaptation>). DNA sequences have  
551 also been deposited in NCBI Genbank (accession #'s XXXXXXXX).

552

### 553 **Author Contributions**

554 DJB, JHS, CB, RJT, and RDG conceived and designed the research. DJB and JHS  
555 conducted the research. CB, RJT, RDG, and JHS funded the research. DJB and JHS  
556 performed the analyses. DJB, JHS, CB, RJT, and RDG wrote the paper.

557

### 558 **Funding**

559 This work was supported by the US Geological Survey's National Resources  
560 Preservation and Global Climate Change Research Programme Award #1434-  
561 00HQURU1585 (C.B.), NSF grant OCE06-23678 (R.J.T.), small grants (D.J.B.) from the  
562 University of Hawai'i's Arts and Sciences Advisory Council, Department of Zoology  
563 Edmondson Fund, and an E.E.C.B. research award through NSF grant DGE05-38550 to  
564 K.Y. Kaneshiro.

565

566

### References

- 567 **Baird, A. H., Bhagooli, R., Ralph, P. J. and Takahashi, S.** (2009). Coral  
568 bleaching: the role of the host. *Trends in Ecology & Evolution* **24**, 16-20.
- 569 **Baird, A. H., Cumbo, V. R., Leggat, B. and Rodriguez-Lanetty, M.** (2007).  
570 Fidelity and flexibility in coral symbioses. *Marine Ecology Progress Series* **347**, 307-  
571 309.
- 572 **Barshis, D., Ladner, J. T., Oliver, T. A., Seneca, F. O., Traylor-Knowles, N.**  
573 **and Palumbi, S. R.** (2013). Genomic basis for coral resilience to climate change.  
574 *Proc Natl Acad Sci U S A* **110**, 1387-92.
- 575 **Barshis, D. J., Stillman, J. H., Gates, R. D., Toonen, R. J., Smith, L. W. and**  
576 **Birkeland, C.** (2010). Protein expression and genetic structure of the coral *Porites*  
577 *lobata* in an environmentally extreme Samoan back reef: does host genotype limit  
578 phenotypic plasticity? *Molecular ecology* **19**, 1705-1720.
- 579 **Bay, R. A. and Palumbi, S. R.** (2014). Multilocus adaptation associated with  
580 heat resistance in reef-building corals. *Current Biology* **24**, 2952-2956.
- 581 **Bay, R. A. and Palumbi, S. R.** (2015). Rapid acclimation ability mediated by  
582 transcriptome changes in reef-building corals. *Genome biology and evolution* **7**,  
583 1602-1612.
- 584 **Bell, G. and Gonzalez, A.** (2009). Evolutionary rescue can prevent extinction  
585 following environmental change. *Ecology Letters* **12**, 942-948.
- 586 **Bellantuono, A. J., Granados-Cifuentes, C., Miller, D. J., Hoegh-Guldberg,**  
587 **O. and Rodriguez-Lanetty, M.** (2012a). Coral thermal tolerance: tuning gene  
588 expression to resist thermal stress. *PLoS One* **7**, e50685.
- 589 **Bellantuono, A. J., Hoegh-Guldberg, O. and Rodriguez-Lanetty, M.**  
590 (2012b). Resistance to thermal stress in corals without changes in symbiont  
591 composition. *Proceedings of the Royal Society B-Biological Sciences* **279**, 1100-1107.
- 592 **Brown, B., Dunne, R., Edwards, A., Sweet, M. and Phongsuwan, N.** (2015).  
593 Decadal environmental 'memory' in a reef coral? *Marine Biology* **162**, 479-483.
- 594 **Camp, E. F., Smith, D. J., Evenhuis, C., Enochs, I., Manzello, D., Woodcock,**  
595 **S. and Suggett, D. J.** (2016). Acclimatization to high-variance habitats does not



596 enhance physiological tolerance of two key Caribbean corals to future temperature  
597 and pH. *Proc. R. Soc. B* **283**, 20160442.

598 **Castillo, K. D. and Helmuth, B.** (2005). Influence of thermal history on the  
599 response of *Montastraea annularis* to short-term temperature exposure. *Marine*  
600 *Biology* **148**, 261-270.

601 **Castillo, K. D., Ries, J. B., Weiss, J. M. and Lima, F. P.** (2012). Decline of  
602 forereef corals in response to recent warming linked to history of thermal exposure.  
603 *Nature Climate Change* **2**, 756-760.

604 **Craig, P., Birkeland, C. and Belliveau, S.** (2001). High temperatures  
605 tolerated by a diverse assemblage of shallow-water corals in American Samoa. *Coral*  
606 *Reefs* **20**, 185-189.

607 **Cunning, R., Yost, D. M., Guarinello, M. L., Putnam, H. M. and Gates, R. D.**  
608 (2015). Variability of *Symbiodinium* communities in waters, sediments, and corals of  
609 thermally distinct reef pools in American Samoa. *PLoS One* **10**, e0145099.

610 **D'angelo, C., Hume, B. C., Burt, J., Smith, E. G., Achterberg, E. P. and**  
611 **Wiedenmann, J.** (2015). Local adaptation constrains the distribution potential of  
612 heat-tolerant *Symbiodinium* from the Persian/Arabian Gulf. *The ISME journal* **9**,  
613 2551-2560.

614 **Dempster, E. R.** (1955). Maintenance of genetic heterogeneity. *Cold Spring*  
615 *Harbor Symposia on Quantitative Biology* **20**, 25-32.

616 **DeWitt, T. J. and Scheiner, S. M.** (2004). Phenotypic variation from single  
617 genotypes. In *Phenotypic Plasticity: Functional and conceptual approaches*, eds. T. J.  
618 DeWitt and S. M. Scheiner), pp. 1-9. New York: Oxford University Press.

619 **Dixon, G. B., Davies, S. W., Aglyamova, G. V., Meyer, E., Bay, L. K. and**  
620 **Matz, M. V.** (2015). Genomic determinants of coral heat tolerance across latitudes.  
621 *Science* **348**, 1460-1462.

622 **Feder, J., Egan, S. and Nosil, P.** (2012). The genomics of speciation-with-  
623 gene-flow. *Trends in Genetics* **28**, 342-350.

624 **Fitt, W. K., Brown, B. E., Warner, M. E. and Dunne, R. P.** (2001). Coral  
625 bleaching: interpretation of thermal tolerance limits and thermal thresholds in  
626 tropical corals. *Coral Reefs* **20**, 51-65.

627 **Gates, R. D. and Edmunds, P. J.** (1999). The physiological mechanisms of  
628 acclimatization in tropical reef corals. *American Zoologist*, 30-43.

629 **Hall, T.** (2001). BioEdit: Biological sequence alignment editor: Department of  
630 Microbiology, North Carolina State University.

631 **Hancock, A. M., Brachi, B., Faure, N., Horton, M. W., Jarymoqwycz, L. B.,**  
632 **Sperone, F. G., Toomajian, C., Roux, F. and Bergelson, J.** (2011). Adaptation to  
633 climate across the *Arabidopsis thaliana* genome. *Science* **334**, 83-86.

634 **Heron, S. F., Maynard, J. A. and Ruben van Hooijdonk, C.** (2016). Warming  
635 trends and bleaching stress of the world's coral reefs 1985–2012. *Scientific Reports*  
636 **6**.

637 **Hoegh-Guldberg, O., Mumby, P. J., Hooten, A. J., Steneck, R. S., Greenfield,**  
638 **P., Gomez, E., Harvell, C. D., Sale, P. F., Edwards, A. J., Caldeira, K. et al.** (2007).  
639 Coral reefs under rapid climate change and ocean acidification. *Science* **318**, 1737-  
640 1742.

- 641 **Hoey, J. and Pinsky, M. L.** (2018). Genomic signatures of environmental  
642 selection despite near-panmixia in summer flounder. *Evolutionary Applications*  
643 **Accepted.**
- 644 **Hoffmann, A. A. and Sgro, C. M.** (2011). Climate change and evolutionary  
645 adaptation. *Nature* **470**, 479-485.
- 646 **Houck, J. E., Buddemeier, R. W., Smith, S. V. and Jokiel, P. L.** (1977). The  
647 response of coral growth rate and skeletal strontium content to light intensity and  
648 water temperature. *Proc 3rd International Coral Reef Symp* **2**, 425-431.
- 649 **Howells, E. J., Beltran, V. H., Larsen, N. W., Bay, L. K., Willis, B. L. and van**  
650 **Oppen, M. J. H.** (2012). Coral thermal tolerance shaped by local adaptation of  
651 photosymbionts. *Nature Climate Change* **2**, 116.
- 652 **Kawecki, T. J. and Ebert, D.** (2004). Conceptual issues in local adaptation.  
653 *Ecology Letters* **7**, 1225-1241.
- 654 **Kenkel, C., Goodbody - Gringley, G., Caillaud, D., Davies, S., Bartels, E.**  
655 **and Matz, M.** (2013). Evidence for a host role in thermotolerance divergence  
656 between populations of the mustard hill coral (*Porites astreoides*) from different reef  
657 environments. *Molecular ecology* **22**, 4335-4348.
- 658 **Kenkel, C., Setta, S. and Matz, M.** (2015). Heritable differences in fitness-  
659 related traits among populations of the mustard hill coral, *Porites astreoides*.  
660 *Heredity* **115**, 509-516.
- 661 **Kenkel, C. D. and Matz, M. V.** (2016). Gene expression plasticity as a  
662 mechanism of coral adaptation to a variable environment. *Nature Ecology &*  
663 *Evolution* **1**, 0014.
- 664 **Levene, H.** (1953). Genetic equilibrium when more than one ecological niche  
665 is available. *The American Naturalist* **87**, 331-333.
- 666 **Loya, Y., Sakai, K., Yamazato, K., Nakano, Y., Sambali, H. and van Woesik,**  
667 **R.** (2001). Coral bleaching: the winners and the losers. *Ecology Letters* **4**, 122-131.
- 668 **Lundgren, P., Vera, J. C., Peplow, L., Manel, S. and van Oppen, M. J.** (2013).  
669 Genotype–environment correlations in corals from the Great Barrier Reef. *BMC*  
670 *genetics* **14**, 9.
- 671 **Matz, M. V., Trembl, E. A., Aglyamova, G. V. and Bay, L. K.** (2018). Potential  
672 and limits for rapid genetic adaptation to warming in a Great Barrier Reef coral.  
673 *PLoS genetics* **14**, e1007220.
- 674 **Meyer, E., Davies, S., Wang, S., Willis, B. L., Abrego, D., Juenger, T. E. and**  
675 **Matz, M. V.** (2009). Genetic variation in responses to a settlement cue and elevated  
676 temperature in the reef-building coral *Acropora millepora*. *Marine Ecology Progress*  
677 *Series* **392**, 81-92.
- 678 **Middlebrook, R., Hoegh-Guldberg, O. and Leggat, W.** (2008). The effect of  
679 thermal history on the susceptibility of reef-building corals to thermal stress. *The*  
680 *Journal of Experimental Biology* **211**, 1050-1056.
- 681 **Nakamura, T. and Van Woesik, R.** (2001). Water-flow rates and passive  
682 diffusion partially explain differential survival of corals during the 1998 bleaching  
683 event. *Marine Ecology Progress Series* **212**, 301-304.

- 684 **Oliver, T. A. and Palumbi, S. R.** (2009). Distributions of stress-resistant  
685 coral symbionts match environmental patterns at local but not regional scales.  
686 *Marine Ecology Progress Series* **378**, 93-103.
- 687 **Oliver, T. A. and Palumbi, S. R.** (2011). Do fluctuating temperature  
688 environments elevate coral thermal tolerance? *Coral Reefs* **30**, 429-440.
- 689 **Paganini, A. W., Miller, N. A. and Stillman, J. H.** (2014). Temperature and  
690 acidification variability reduce physiological performance in the intertidal zone  
691 porcelain crab *Petrolisthes cinctipes*. *Journal of Experimental Biology* **217**, 3974-  
692 3980.
- 693 **Palumbi, S. R.** (2004). Marine reserves and ocean neighborhoods: the spatial  
694 scale of marine populations and their management. *Annu. Rev. Environ. Resour.* **29**,  
695 31-68.
- 696 **Palumbi, S. R., Barshis, D. J., Traylor-Knowles, N. and Bay, R. A.** (2014).  
697 Mechanisms of reef coral resistance to future climate change. *Science* **344**, 895-898.
- 698 **Pandolfi, J. M., Connolly, S. R., Marshall, D. J. and Cohen, A. L.** (2011).  
699 Projecting coral reef futures under global warming and ocean acidification. *Science*  
700 **333**, 418-422.
- 701 **Pineda, J., Starczak, V. R., Tarrant, A. M., Blythe, J. N., Davis, K. A., Farrar,  
702 J. T., Berumen, M. L. and da Silva, J. C.** (2013). Two spatial scales in a bleaching  
703 event: Corals from the mildest and the most extreme thermal environments escape  
704 mortality. *Limnology and Oceanography* **58**, 1531-1545.
- 705 **Piniak, G. A. and Brown, E. K.** (2009). Temporal variability in chlorophyll  
706 fluorescence of back-reef corals in Ofu, American Samoa. *Biological Bulletin* **216**, 55-  
707 67.
- 708 **Pinsky, M. L., Saenz-Agudelo, P., Salles, O. C., Almany, G. R., Bode, M.,  
709 Berumen, M. L., Andréfouët, S., Thorrold, S. R., Jones, G. P. and Planes, S.** (2017).  
710 Marine dispersal scales are congruent over evolutionary and ecological time.  
711 *Current Biology* **27**, 149-154.
- 712 **Polzin, T. and Daneschmand, S. V.** (2003). On Steiner trees and minimum  
713 spanning trees in hypergraphs. *Operations Research Letters* **31**, 12-20.
- 714 **Potts, D., Done, T., Isdale, P. and Fisk, D.** (1985). Dominance of a coral  
715 community by the genus *Porites* (Scleractinia). *Marine Ecology Progress Series*, 79-  
716 84.
- 717 **Putnam, H. M., Davidson, J. M. and Gates, R. D.** (2016). Ocean acidification  
718 influences host DNA methylation and phenotypic plasticity in environmentally  
719 susceptible corals. *Evolutionary Applications* **9**, 1165-1178.
- 720 **Putnam, H. M. and Edmunds, P. J.** (2011). The physiological response of  
721 reef corals to diel fluctuations in seawater temperature. *Journal of Experimental  
722 Marine Biology and Ecology* **396**, 216-223.
- 723 **Putnam, H. M. and Gates, R. D.** (2015). Preconditioning in the reef-building  
724 coral *Pocillopora damicornis* and the potential for trans-generational acclimatization  
725 in coral larvae under future climate change conditions. *Journal of Experimental  
726 Biology* **218**, 2365-2372.
- 727 **R\_Core\_Team.** (2015). R: A language and environment for statistical  
728 computing, (ed. R. F. f. S. Computing). Vienna, Austria.

729 **Ravigné, V., Olivieri, I. and Dieckmann, U.** (2004). Implications of habitat  
730 choice for protected polymorphisms. *Evolutionary Ecology Research* **6**.

731 **Safaie, A., Silbiger, N., McClanahan, T., Pawlak, G., Barshis, D., Hench, J.,**  
732 **Rogers, J., Williams, G. and Davis, K.** (2018). High frequency temperature  
733 variability reduces the risk of coral bleaching. *Nature Communications* **9**.

734 **Sanford, E. and Kelly, M. W.** (2011). Local adaptation in marine  
735 invertebrates. *Annual Review of Marine Science* **3**, 509-535.

736 **Schluter, D.** (2000). *The Ecology of Adaptive Radiation*. Oxford: Oxford  
737 University Press.

738 **Schneider, S., Roessli, D. and L. Excoffier.** (2000). Arlequin: A software for  
739 population genetics data analysis: Genetics and Biometry Lab, Dept. of  
740 Anthropology, University of Geneva.

741 **Smith, L. W., Barshis, D. J. and Birkeland, C.** (2007). Phenotypic plasticity  
742 for skeletal growth, density and calcification of *Porites lobata* in response to habitat  
743 type. *Coral Reefs* **26**, 559-567.

744 **Smith, L. W. and Birkeland, C.** (2007). Effects of intermittent flow and  
745 irradiance level on back reef *Porites* corals at elevated seawater temperatures.  
746 *Journal of Experimental Marine Biology and Ecology* **341**, 282-294.

747 **Smith, L. W., Wirshing, H., Baker, A. C. and Birkeland, C.** (2008).  
748 Environmental versus genetic influences on growth rates of the corals *Pocillopora*  
749 *eydouxi* and *Porites lobata* (Anthozoa: Scleractinia). *Pacific Science* **62**, 57-69.

750 **van Oppen, M. J. H., Bongaerts, P., Frade, P., Peplow, L., Boyd, S., Nim, H.**  
751 **and Bay, L.** (2018). Adaptation to reef habitats through selection on the coral  
752 animal and its associated microbiome. *Molecular ecology Online First*.

753 **van Woesik, R., Sakai, K., Ganase, A. and Loya, Y.** (2011). Revisiting the  
754 winners and the losers a decade after coral bleaching.

755

## 756 **Figure Legends**

757 **Figure 1.** Daily mean (squares), minimum and maximum (dark circles)  $\pm$  95%  
758 confidence intervals of each acclimation aquarium during the 35-day acclimation period  
759 (left-hand axis) and boxplot of daily temperature range (right-hand axis) of each  
760 acclimation aquarium.

761

762 **Figure 2.** Linear tissue extension measurements taken after the 35-day acclimation  
763 period. Values are category means  $\pm$  1 SD. Statistical significance at  $p < 0.05$  (\*) is  
764 presented for comparison of source colony origins (O).

765

766 **Figure 3.** Pulse Amplitude Modulated fluorometry (PAM) measured maximum quantum  
767 yield (Fv/Fm) of corals during 5 days of the ramping temperature exposure. PAM  
768 measurements were taken at the end of the experimental day following  $\geq$  45 minutes of  
769 dark adaptation. The experimental temperature profile is shown as the solid black line  
770 and on the right-hand axis. Squares, triangles, and circles represent source colonies from  
771 the High Variability (HV) pool, Medium Variability (MV) pool, and forereef (FR)  
772 respectively and open and shaded symbols are for stable and variable acclimation  
773 treatments, respectively. Values are category means  $\pm$  1 SD. Statistical significance at  $p <$   
774  $0.05$  (\*),  $p < 0.01$  (\*\*), and  $p < 0.001$  (\*\*\*) is presented for overall comparisons of

775 source colony origin (O), acclimation treatment (A), day (D), and the various interactions  
776 (e.g., OxA) along the left hand y-axis, while within-day contrasts are presented along the  
777 x-axis.

778

779 **Figure 4.** *Symbiodinium* heat shock protein 70 levels across the entire sampling period:  
780 field baseline, post-acclimation, and days 1-5 of the temperature ramp. All values are  
781 relative to a single control extract. Values are category means  $\pm$  1 SD. Symbols and  
782 significance values are denoted as in Figure 3.

783

784 **Figure 5.** *Symbiodinium* ubiquitin-conjugate protein levels across the entire sampling  
785 period: field baseline, post-acclimation, and days 1-5 of the temperature ramp. All values  
786 are relative to a single control extract. Values are category means  $\pm$  1 SD. Symbols and  
787 significance values are denoted as in Figure 3.

788

789 **Figure 6.** Coral host heat shock protein 70 levels across the entire sampling period: field  
790 baseline, post-acclimation, and days 1-5 of the temperature ramp. All values are relative  
791 to a single control extract. Values are category means  $\pm$  1 SD. Symbols and significance  
792 values are denoted as in Figure 3.

793

794 **Figure 7.** Coral ubiquitin-conjugate protein levels across the entire sampling period: field  
795 baseline, post-acclimation, and days 1-5 of the temperature ramp. All values are relative  
796 to a single control extract. Values are category means  $\pm$  1 SD. Symbols and significance  
797 values are denoted as in Figure 3.

798

799 **Figure 8.** Maximum parsimony phylogenetic network reconstruction of ITS rDNA  
800 haplotypes drawn in NETWORK ver 4.5.0.0 (Fluxus Technology Ltd.; Polzin &  
801 Daneschmand 2003). Haplotypes shown in red, yellow, and blue are from HV, MV, and  
802 forereef populations respectively. Diameter of circles at each node is proportional to the  
803 number of individuals with identical sequences. Haplotypes that co-occur in the same  
804 individual are connected by colored curves. Mutations are shown in red on each branch  
805 with the number corresponding to the base pair position, hypothetical intermediate  
806 haplotypes are designated by black circles. NCBI accession numbers for all sequences  
807 used in this study are XXXXX-XXXXX.

808

809

#### Supplementary Figure Legends

810 **Figure S1.** Experimental tank temperatures measured every 15 min during the 36-day  
811 acclimation period. The variable tank is shown in red and the stable tank in blue.

812

Figure 1

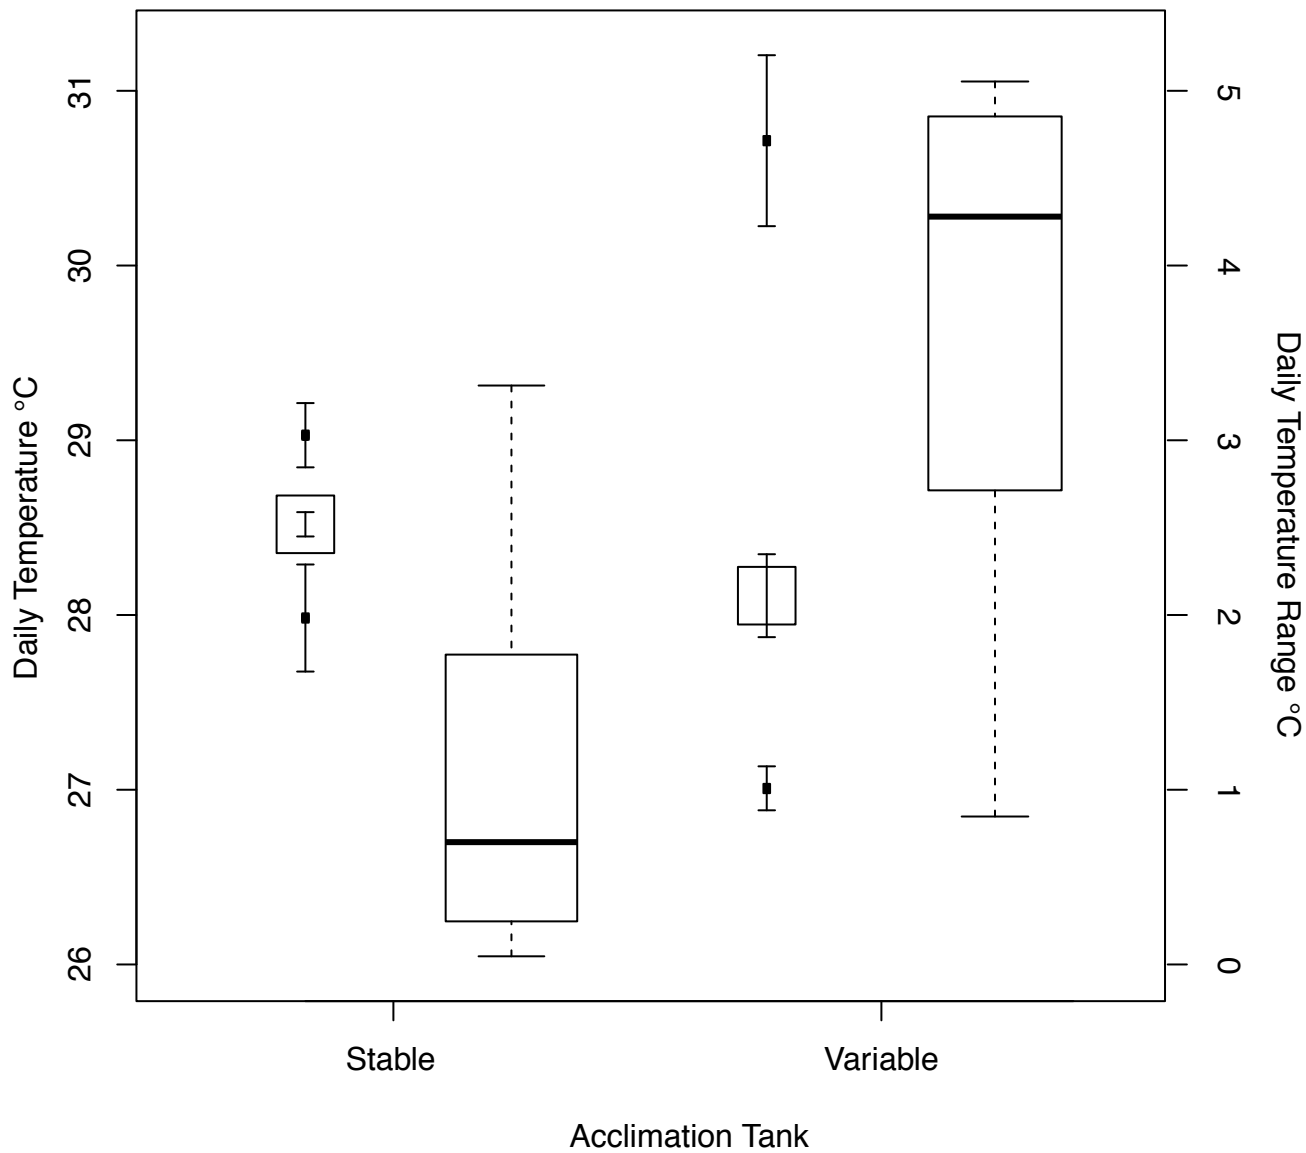

Figure 2

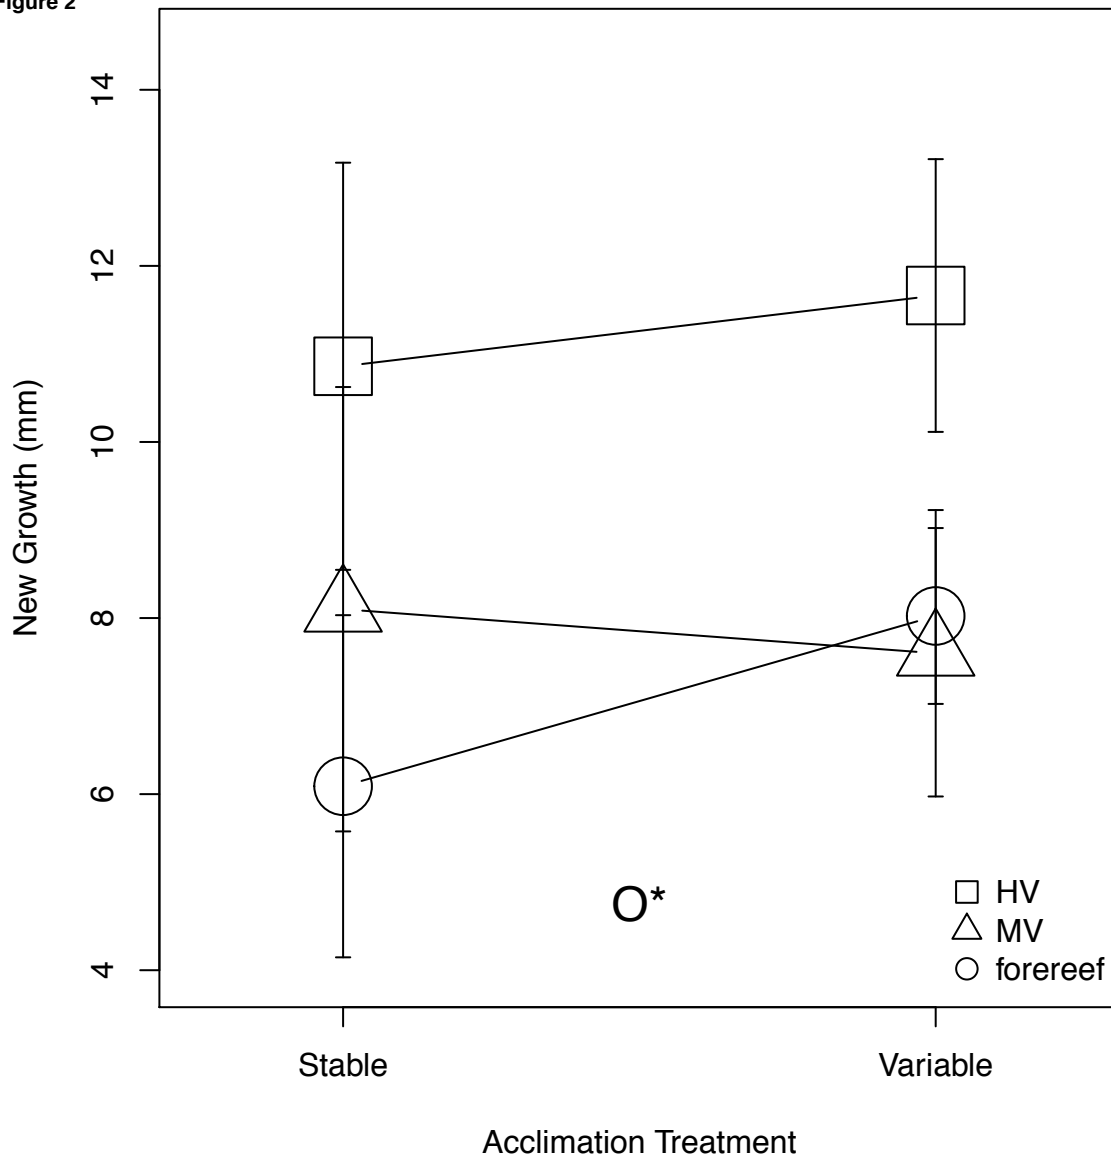

Figure 3

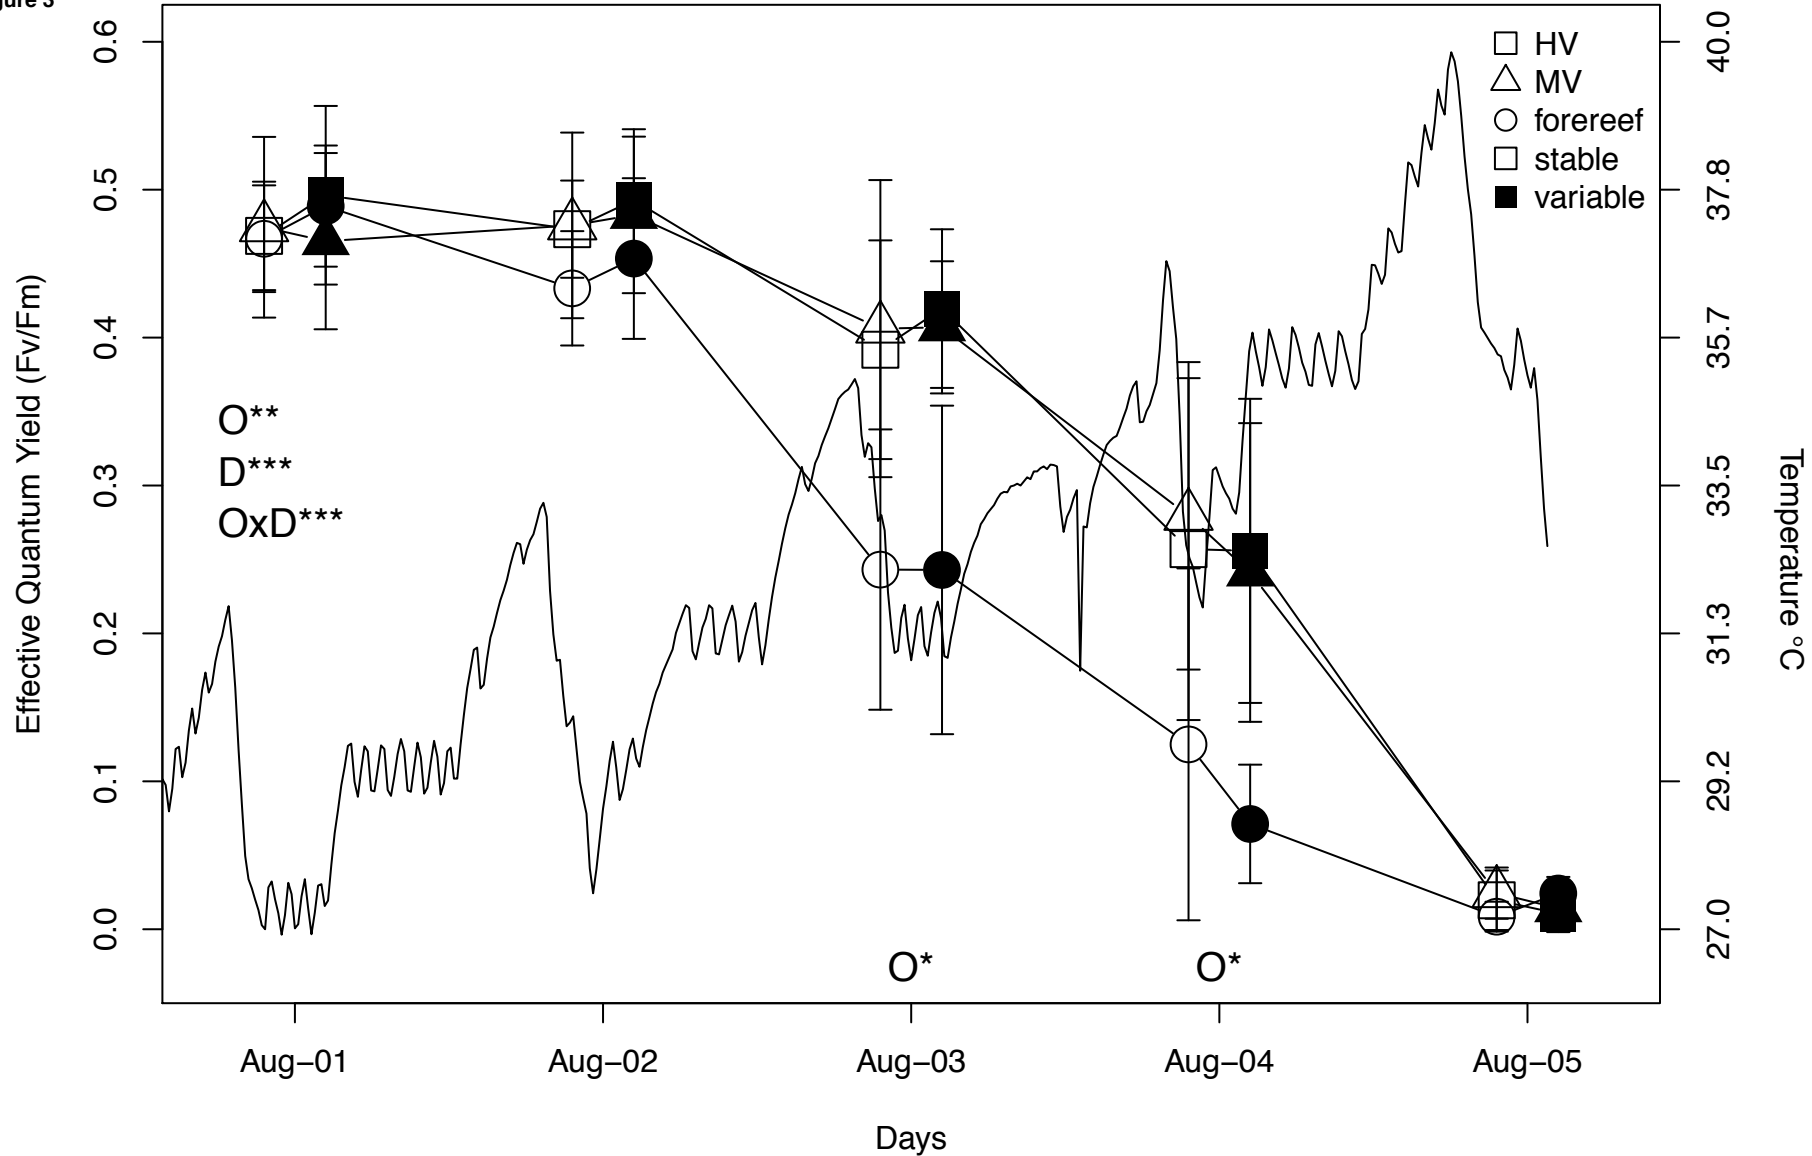



Figure 4

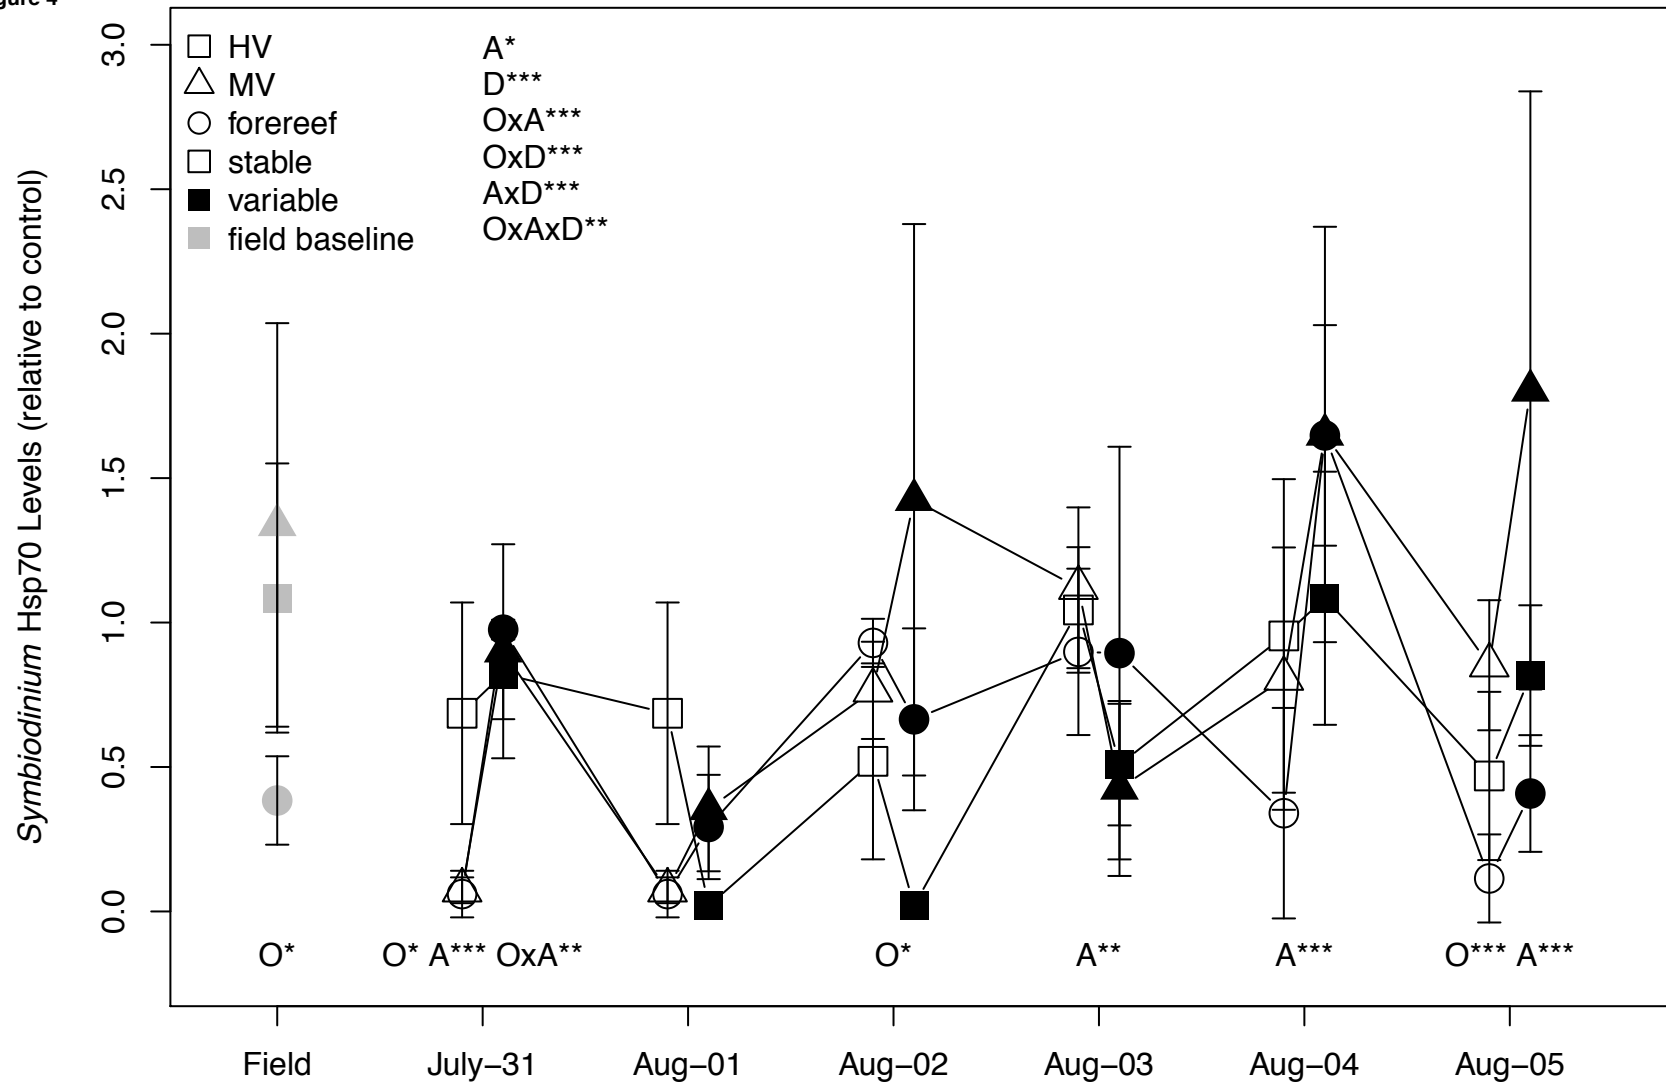

Figure 5

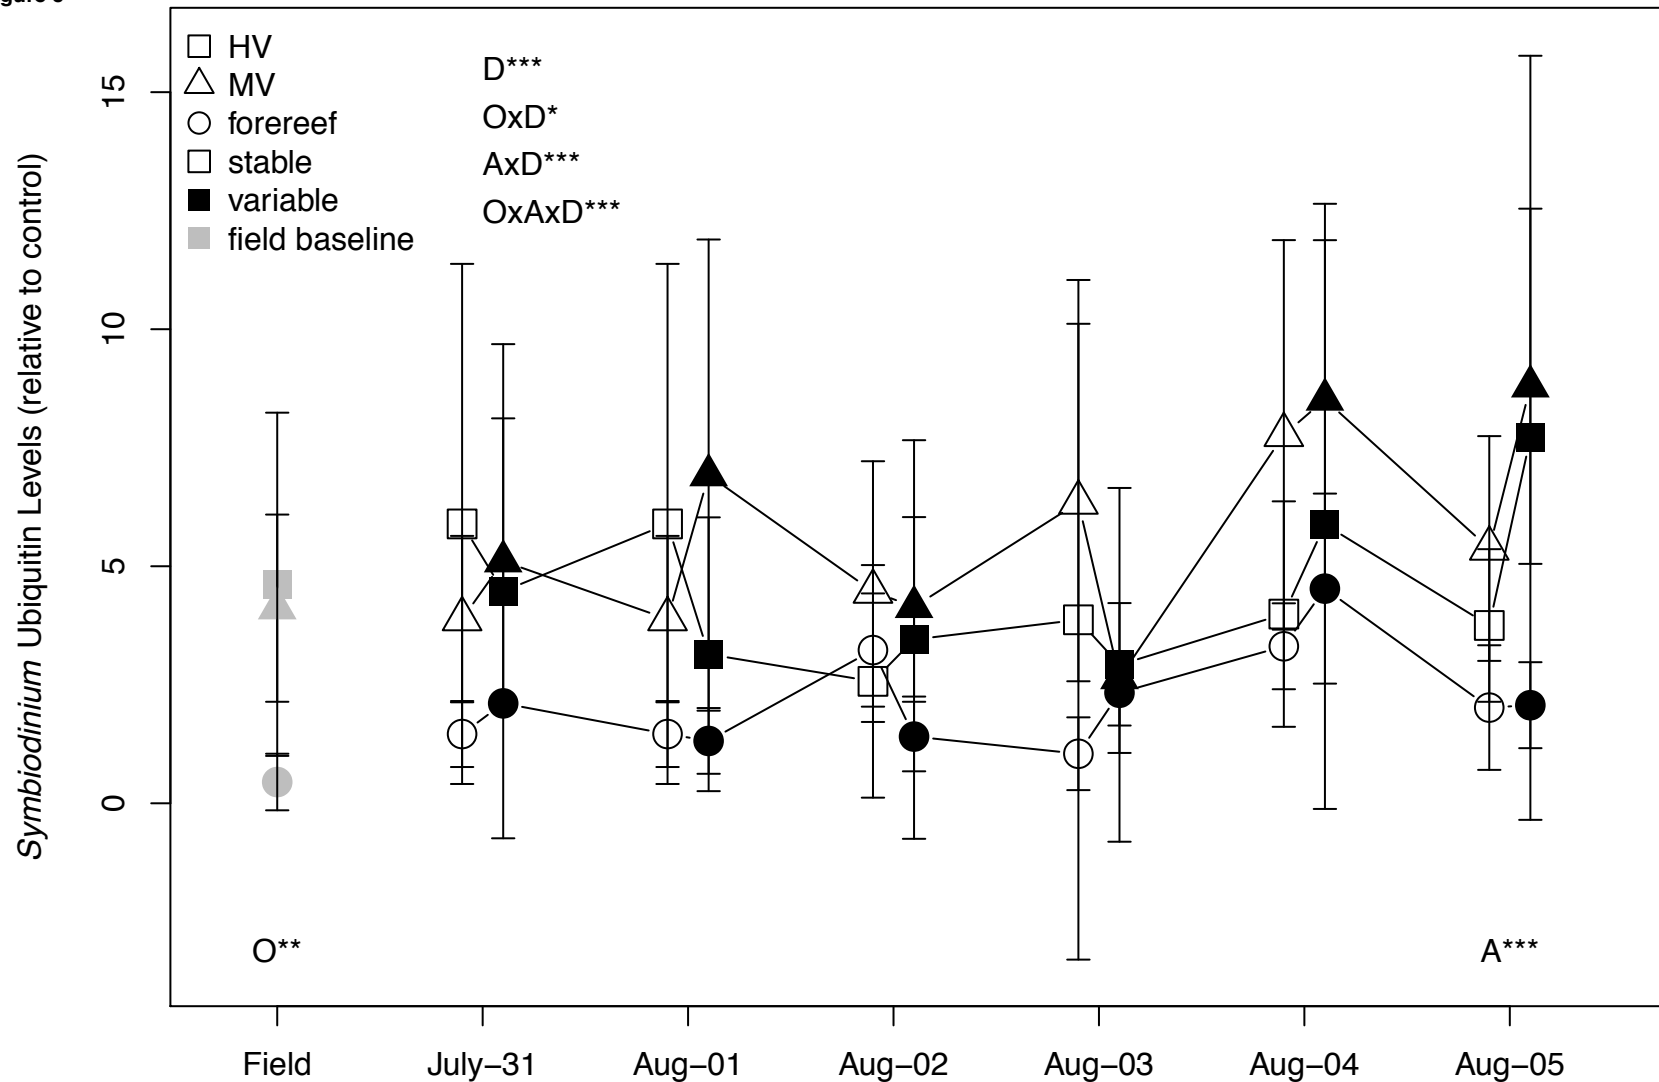

Figure 6

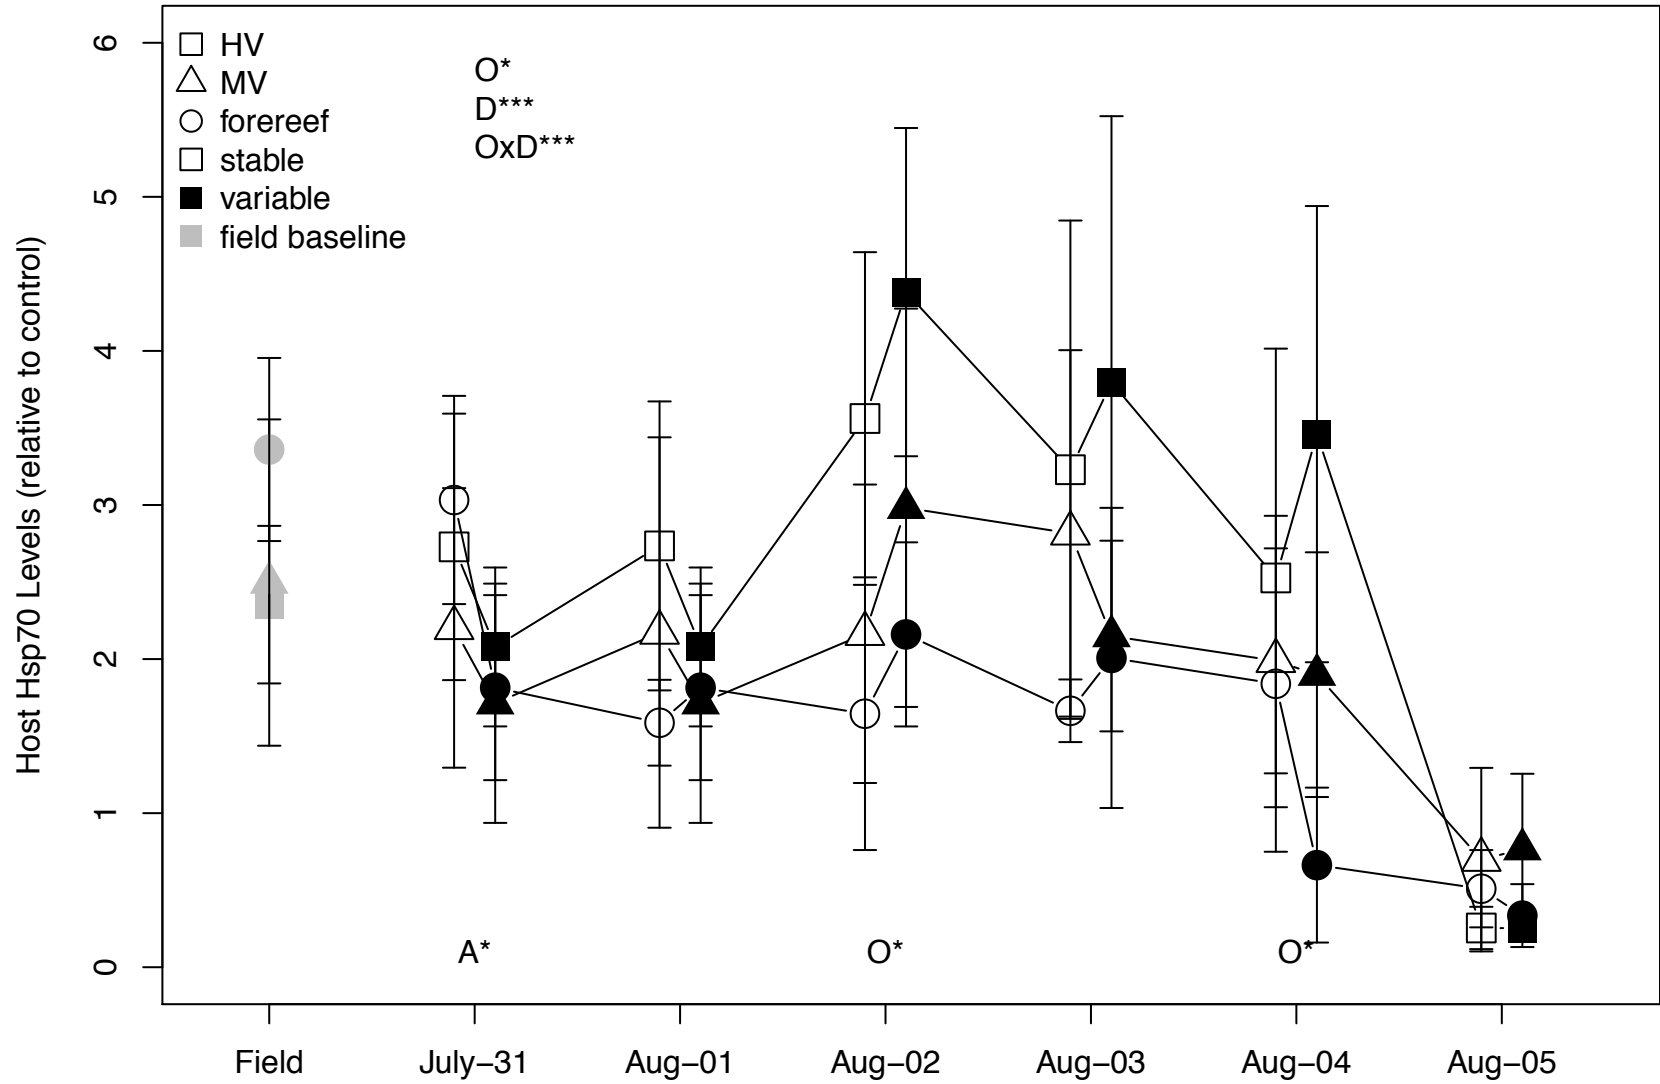

Figure 7

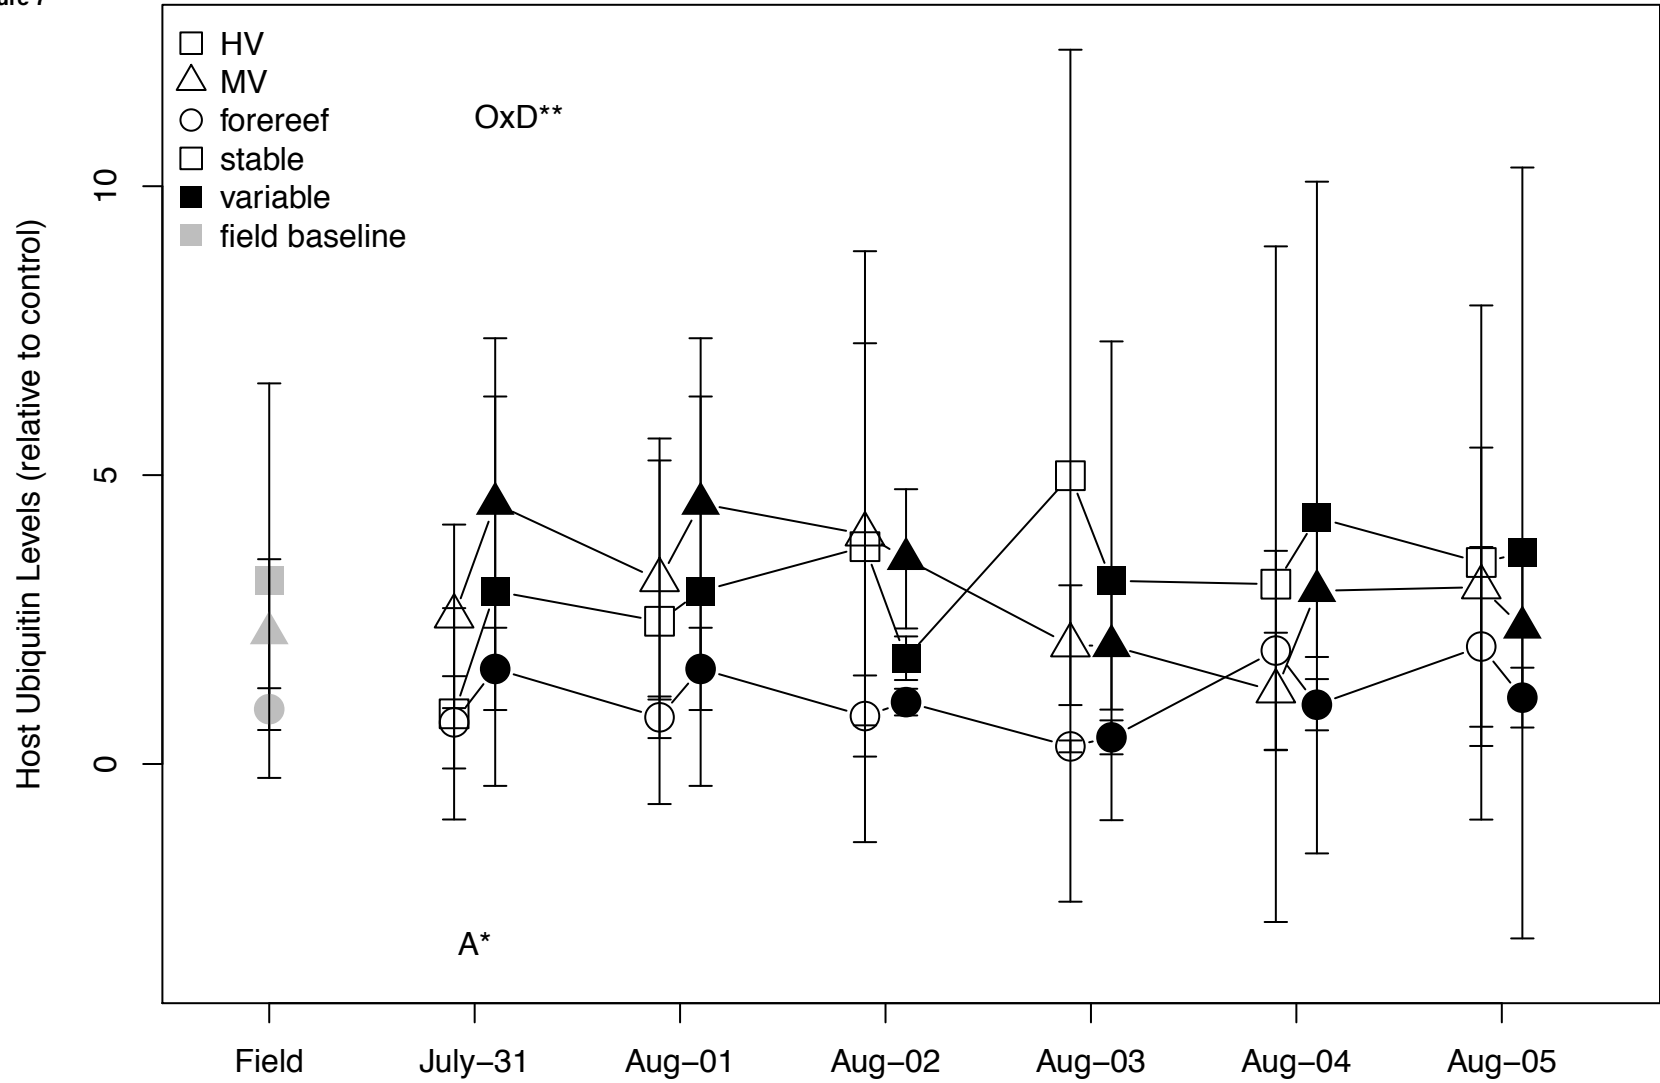

Source: https://www.biorxiv.org/content/10.1101/367763v1.full.pdf
